# Supplementary material
Source: publisher site journal article supplement (https://www.dovepress.com/article/519504)
Supplement: Supplementary file 1 [file get_supplementary_file.php]

| Drugs | Target adverse reaction | Other adverse reaction | Total |
| --- | --- | --- | --- |
| Target drug | a | b | a+b |
| Other drugs | c | d | c+d |
| Total | a+c | b+d | a+b+c+d |

**Table S1: Schematic table of drug analysis.**

For the above table, acquiring values for variables a, b, c, and d was indispensable. Variable “a” stood for those experiencing desired AEs post target drug, “b” represented individuals with non-target AEs post target drug, “c” denoted individuals experiencing the target AE without target drug, and “d” stood for those with non-target AEs without target drug. The total count N was the sum of a, b, c, and d (N=a+b+c+d).

**Table S2: The specific formulas for the four measures.**

| Algorithms | Equation | Criteria |
| --- | --- | --- |
| Reporting odds ratio (ROR) |  | 95%CI >1, a ≥3 |
| Proportional reporting ratio (PRR) |  | PRR ≥2, with ≥4 and a ≥3 |
| Bayesian confidence propagation neural network (BCPNN) | *α=β=2, α1=β1=γ11=1* | IC025 (lower limit of 95% CI) >0 |
| Empirical Bayesian Geometric Mean (EBGM) |  | EBGM05 (lower limit of 95% CI) >2 |

For the above formulas, acquiring values for variables a, b, c, and d was indispensable. Variable “a” stood for those experiencing desired AEs post target drug, “b” represented individuals with non-target AEs post target drug, “c” denoted individuals experiencing the target AE without target drug, and “d” stood for those with non-target AEs without target drug. The total count N was the sum of a, b, c, and d (N=a+b+c+d).

**Table S3: Liposome bupivacaine and bupivacaine adverse drug reactions instructions.**

| Expected adverse reactions of liposome bupivacine and their corresponding preferred terms | | Expected adverse reactions of bupivacine and their corresponding preferred terms | |
| --- | --- | --- | --- |
| Adverse Reaction | Preferred term | Adverse Reaction | Preferred term |
| Pyrexia | Headache | Nervousness | Tension |
| Dizziness | Sleep Disorder | Dizziness | Dizziness |
| Peripheral Edema | Syncope | Blurred Vision | Vision Blurred |
| Anemia | Dizziness | Tremors | Tremor |
| Hypotension | Withdrawal Syndrome | Drowsiness | Somnolence |
| Pruritus | Drug Dependence | Convulsions | Convulsions Local |
| Tachycardia | Myalgia | Unconsciousness | Unconsciousness |
| Headache | Dyspepsia | Respiratory Arrest | Respiratory Arrest |
| Insomnia | Diarrhoea | Nausea | Nausea |
| Postoperative Anemia | Hiccups | Vomiting | Vomiting |
| Muscle Spasms | Chest Discomfort | Chills | Chills |
| Hemorrhagic Anemia | Bronchitis | Constriction Of The Pupils | Miosis |
| Back Pain | Hypertension | Tinnitus | Tinnitus |
| Somnolence | Influenza Like Illness | Hypotension | Hypotension |
| Chills | Pain | Cardiac Arrest | Cardiac Arrest |
| Erythema | Back Pain | Underventilation | Hypoventilation |
| Bradycardia | Paraesthesia | Apnea | Apnoea |
| Anxiety | Flatulence | Restlessness | Restlessness |
| Urinary Retention | Pyrexia | Anxiety | Anxiety |
| Pain | Cough | Paralysis Of The Legs | Quadriplegia |
| Edema | Rhinitis | Loss Of Consciousness | Loss Of Consciousness |
| Tremor | Tooth Disorder | Bradycardia | Bradycardia |
| Postural Dizziness | Sinusitis | Urinary Retention | Urinary Retention |
| Paresthesia | Stomatitis | Fecal And Urinary Incontinence | Incontinence |
| Syncope | Throat Irritation | Paresthesia | Paraesthesia |
| Muscular Weakness | Chest Discomfort | Paralysis Of The Lower Extremities And Loss Of Sphincter Control | Paralysis |
| Neck Pain | Constipation | Headache | Headache |
| Generalized Pruritus | Anxiety | Backache | Back Pain |
| Pruritic Rash | Irritability | Septic Meningitis | Meningococcal Sepsis |
| Hyperhidrosis | Restlessness | Meningismus | Meningism |
| Cold Sweat | Disturbance In Attention | Increased Incidence Of Forceps Delivery | Forceps Delivery |
| Urticaria | Weight Increased | And Cranial Nerve Palsies | Cranial Nerve Palsies Multiple |
| Palpitations | Affect Lability | Depression Of The Myocardium | Myocardial Depression |
| Sinus Bradycardia | Somnolence | Bradycardia | Bradycardia |
| Supraventricular Extrasystoles | Fatigue | Ventricular Arrhythmias(Including Ventricular Tachycardia And Ventricular Fibrillation) | Ventricular Tachycardia |
| Ventricular Extrasystoles | Insomnia | Ventricular Arrhythmias(Including Ventricular Tachycardia And Ventricular Fibrillation) | Ventricular Fibrillation |
| Ventricular Tachycardia | Confusion | Joint Cartilage Necrosis | Chondrolysis |
| Hypertension | Depression | Methemoglobinemia | Methaemoglobinaemia |
| Pallor | Apathy | Gi Bleeding | Lower Gastrointestinal Haemorrhage |
| Confusional State | Tremor | Gi Bleeding | Upper Gastrointestinal Haemorrhage |
| Depression | Increased Appetite | Hypertension | Hypertension |
| Agitation | Coordination Abnormal | Heart Failure | Cardiac Failure |
| Restlessness | Rhinorrhoea | Edema | Oedema |
| Hypoxia | Lacrimation Increased | Renal Toxicity | Nephropathy Toxic |
| Laryngospasm | Sneezing | Hyperkalemia | Hyperkalaemia |
| Apnea | Nasal Discomfort | Impaired Renal Function | Renal Impairment |
| Respiratory Depression | Dyspnoea | Dehydration | Dehydration |
| Respiratory Failure | Nausea | Hypovolemia | Hypovolaemia |
| Increased Body Temperature | Arthralgia | Liver Dysfunction | Hepatic Function Abnormal |
| Increased Blood Pressure | Menstrual Disorder | Eosinophilia And Systemic Symptoms | Drug Reaction With Eosinophilia And Systemic Symptoms |
| Decreased Blood Pressure | Palpitations | Rash | Rash |
| Decreased Oxygen Saturation | Abdominal Pain | Lymphadenopathy | Lymphadenopathy |
| Urinary Incontinence | Confusional State | And/Or Facial Swelling | Face Oedema |
| Blurred Vision | Acne | Hepatitis | Hepatitis |
| Tinnitus | Dysmenorrhoea | Nephritis | Nephritis |
| Drug Hypersensitivity | Pruritus | Myocarditis | Myocarditis |
| Hypersensitivity | Oedema Peripheral |  |  |
| Hypoesthesia | Hypersensitivity |  |  |
| Lethargy | Dry Mouth |  |  |
| Tachycardia | Hiccups |  |  |
| Bradycardia | Aphasia |  |  |
| Angioneurotic Edema | Amnesia |  |  |
| Laryngeal Edema | Migraine |  |  |
| Sneezing | Bronchospasm |  |  |
| Nausea | Sputum Increased |  |  |
| Vomiting | Rash |  |  |
| Chondrolysis | Purpura |  |  |

**Table S4: Liposome bupivacaine and bupivacaine Positive signal.**

| Liposome bupivacine | | | | | | | | | | |
| --- | --- | --- | --- | --- | --- | --- | --- | --- | --- | --- |
| PT | a | b | c | d | Soc_name_en | ROR(95%Cl) | PRR(χ2) | EBGM(EBGM05) | IC(IC025) |
| Hypoaesthesia | 98 | 3791 | 135981 | 53629520 | Nervous system disorders | 10.2 ( 8.34 - 12.46 ) | 9.96 ( 791.7 ) | 9.96 ( 8.42 ) | 3.32 ( 1.65 ) |
| Urinary retention | 49 | 3840 | 29294 | 53736207 | Renal and urinary disorders | 23.41 ( 17.66 - 31.03 ) | 23.13 ( 1036.08 ) | 23.09 ( 18.24 ) | 4.53 ( 2.86 ) |
| Infection | 31 | 3858 | 125776 | 53639725 | Infections and infestations | 3.43 ( 2.41 - 4.88 ) | 3.41 ( 52.84 ) | 3.41 ( 2.53 ) | 1.77 ( 0.1 ) |
| Seizure | 26 | 3863 | 97480 | 53668021 | Nervous system disorders | 3.71 ( 2.52 - 5.45 ) | 3.69 ( 51 ) | 3.69 ( 2.67 ) | 1.88 ( 0.22 ) |
| Peroneal nerve palsy | 24 | 3865 | 5218 | 53760283 | Nervous system disorders | 63.98 ( 42.79 - 95.66 ) | 63.59 ( 1471.86 ) | 63.3 ( 45.21 ) | 5.98 ( 4.32 ) |
| Local anaesthetic systemic toxicity | 23 | 3866 | 496 | 53765005 | Injury, poisoning and procedural complications | 644.89 ( 424.04 - 980.75 ) | 641.08 ( 14047.61 ) | 612.71 ( 431.43 ) | 9.26 ( 7.59 ) |
| Bradycardia | 16 | 3873 | 48421 | 53717080 | Cardiac disorders | 4.58 ( 2.8 - 7.49 ) | 4.57 ( 44.62 ) | 4.57 ( 3.03 ) | 2.19 ( 0.52 ) |
| Ileus | 16 | 3873 | 10511 | 53754990 | Gastrointestinal disorders | 21.13 ( 12.93 - 34.53 ) | 21.04 ( 305.07 ) | 21.01 ( 13.93 ) | 4.39 ( 2.73 ) |
| Ileus paralytic | 15 | 3874 | 3858 | 53761643 | Gastrointestinal disorders | 53.96 ( 32.46 - 89.68 ) | 53.75 ( 773.61 ) | 53.55 ( 35 ) | 5.74 ( 4.08 ) |
| Deep vein thrombosis | 14 | 3875 | 60227 | 53705274 | Vascular disorders | 3.22 ( 1.91 - 5.45 ) | 3.21 ( 21.37 ) | 3.21 ( 2.07 ) | 1.68 ( 0.02 ) |
| Osteoarthritis | 14 | 3875 | 38172 | 53727329 | Musculoskeletal and connective tissue disorders | 5.09 ( 3.01 - 8.6 ) | 5.07 ( 45.76 ) | 5.07 ( 3.27 ) | 2.34 ( 0.68 ) |
| Sensory loss | 12 | 3877 | 7297 | 53758204 | Nervous system disorders | 22.8 ( 12.93 - 40.21 ) | 22.74 ( 248.98 ) | 22.7 ( 14.12 ) | 4.5 ( 2.84 ) |
| Arrhythmia | 11 | 3878 | 42978 | 53722523 | Cardiac disorders | 3.55 ( 1.96 - 6.41 ) | 3.54 ( 20.04 ) | 3.54 ( 2.16 ) | 1.82 ( 0.16 ) |
| Horner's syndrome | 11 | 3878 | 441 | 53765060 | Nervous system disorders | 345.82 ( 189.96 - 629.56 ) | 344.84 ( 3679.54 ) | 336.47 ( 203.82 ) | 8.39 ( 6.72 ) |
| Ventricular arrhythmia | 10 | 3879 | 3256 | 53762245 | Cardiac disorders | 42.57 ( 22.86 - 79.25 ) | 42.46 ( 403.62 ) | 42.33 ( 25.17 ) | 5.4 ( 3.74 ) |
| Wound dehiscence | 10 | 3879 | 3066 | 53762435 | Injury, poisoning and procedural complications | 45.21 ( 24.28 - 84.17 ) | 45.09 ( 429.76 ) | 44.95 ( 26.72 ) | 5.49 ( 3.82 ) |
| Delirium | 10 | 3879 | 29897 | 53735604 | Psychiatric disorders | 4.63 ( 2.49 - 8.62 ) | 4.62 ( 28.41 ) | 4.62 ( 2.75 ) | 2.21 ( 0.54 ) |
| Hypoxia | 10 | 3879 | 30678 | 53734823 | Respiratory, thoracic and mediastinal disorders | 4.52 ( 2.43 - 8.4 ) | 4.51 ( 27.29 ) | 4.51 ( 2.68 ) | 2.17 ( 0.51 ) |
| Heart rate decreased | 10 | 3879 | 33214 | 53732287 | Investigations | 4.17 ( 2.24 - 7.76 ) | 4.16 ( 24.03 ) | 4.16 ( 2.48 ) | 2.06 ( 0.39 ) |
| Arthrofibrosis | 10 | 3879 | 76 | 53765425 | Musculoskeletal and connective tissue disorders | 1823.77 ( 942.55 - 3528.87 ) | 1819.08 ( 16057.96 ) | 1607.68 ( 925.41 ) | 10.65 ( 8.96 ) |
| Impaired healing | 9 | 3880 | 28898 | 53736603 | General disorders and administration site conditions | 4.31 ( 2.24 - 8.3 ) | 4.31 ( 22.85 ) | 4.3 ( 2.49 ) | 2.11 ( 0.44 ) |
| Nerve injury | 9 | 3880 | 10241 | 53755260 | Injury, poisoning and procedural complications | 12.18 ( 6.33 - 23.43 ) | 12.15 ( 92.02 ) | 12.14 ( 7.02 ) | 3.6 ( 1.93 ) |
| Paralysis | 8 | 3881 | 13001 | 53752500 | Nervous system disorders | 8.52 ( 4.26 - 17.06 ) | 8.51 ( 52.98 ) | 8.5 ( 4.76 ) | 3.09 ( 1.42 ) |
| Haematoma | 8 | 3881 | 24001 | 53741500 | Vascular disorders | 4.62 ( 2.31 - 9.24 ) | 4.61 ( 22.6 ) | 4.61 ( 2.58 ) | 2.2 ( 0.54 ) |
| Wound infection | 8 | 3881 | 8625 | 53756876 | Infections and infestations | 12.85 ( 6.42 - 25.72 ) | 12.82 ( 87.14 ) | 12.81 ( 7.17 ) | 3.68 ( 2.01 ) |
| Motor dysfunction | 8 | 3881 | 8990 | 53756511 | Nervous system disorders | 12.33 ( 6.16 - 24.67 ) | 12.3 ( 83.01 ) | 12.29 ( 6.88 ) | 3.62 ( 1.95 ) |
| Skin necrosis | 8 | 3881 | 4739 | 53760762 | Skin and subcutaneous tissue disorders | 23.38 ( 11.68 - 46.82 ) | 23.34 ( 170.78 ) | 23.3 ( 13.03 ) | 4.54 ( 2.88 ) |
| Ventricular tachycardia | 7 | 3882 | 14799 | 53750702 | Cardiac disorders | 6.55 ( 3.12 - 13.75 ) | 6.54 ( 32.84 ) | 6.54 ( 3.51 ) | 2.71 ( 1.04 ) |
| Pulse absent | 6 | 3883 | 4359 | 53761142 | Investigations | 19.06 ( 8.55 - 42.47 ) | 19.03 ( 102.36 ) | 19 ( 9.72 ) | 4.25 ( 2.58 ) |
| Generalised tonic-clonic seizure | 6 | 3883 | 13702 | 53751799 | Nervous system disorders | 6.06 ( 2.72 - 13.5 ) | 6.05 ( 25.31 ) | 6.05 ( 3.1 ) | 2.6 ( 0.93 ) |
| Diaphragmatic paralysis | 6 | 3883 | 515 | 53764986 | Respiratory, thoracic and mediastinal disorders | 161.32 ( 72.09 - 360.97 ) | 161.07 ( 943.46 ) | 159.22 ( 81.16 ) | 7.31 ( 5.64 ) |
| Delayed recovery from anaesthesia | 5 | 3884 | 803 | 53764698 | Injury, poisoning and procedural complications | 86.19 ( 35.76 - 207.77 ) | 86.08 ( 417.88 ) | 85.56 ( 40.98 ) | 6.42 ( 4.75 ) |
| Atrioventricular block | 5 | 3884 | 6885 | 53758616 | Cardiac disorders | 10.05 ( 4.18 - 24.17 ) | 10.04 ( 40.67 ) | 10.03 ( 4.82 ) | 3.33 ( 1.66 ) |
| Anal incontinence | 5 | 3884 | 7357 | 53758144 | Gastrointestinal disorders | 9.41 ( 3.91 - 22.62 ) | 9.4 ( 37.49 ) | 9.39 ( 4.51 ) | 3.23 ( 1.56 ) |
| Breakthrough pain | 5 | 3884 | 2200 | 53763301 | General disorders and administration site conditions | 31.46 ( 13.07 - 75.7 ) | 31.42 ( 146.93 ) | 31.35 ( 15.04 ) | 4.97 ( 3.3 ) |
| Arrhythmia supraventricular | 5 | 3884 | 1028 | 53764473 | Cardiac disorders | 67.33 ( 27.95 - 162.2 ) | 67.24 ( 324.71 ) | 66.92 ( 32.07 ) | 6.06 ( 4.4 ) |
| Administration site irritation | 5 | 3884 | 115 | 53765386 | General disorders and administration site conditions | 601.86 ( 245.69 - 1474.34 ) | 601.09 ( 2870.64 ) | 576.08 ( 272.21 ) | 9.17 ( 7.48 ) |
| Administration site swelling | 5 | 3884 | 298 | 53765203 | General disorders and administration site conditions | 232.26 ( 95.91 - 562.44 ) | 231.96 ( 1130.87 ) | 228.15 ( 108.85 ) | 7.83 ( 6.16 ) |
| Peripheral ischaemia | 4 | 3885 | 3677 | 53761824 | Vascular disorders | 15.05 ( 5.64 - 40.15 ) | 15.04 ( 52.37 ) | 15.02 ( 6.61 ) | 3.91 ( 2.24 ) |
| Atrioventricular block complete | 4 | 3885 | 5881 | 53759620 | Cardiac disorders | 9.41 ( 3.53 - 25.1 ) | 9.4 ( 30.02 ) | 9.4 ( 4.14 ) | 3.23 ( 1.57 ) |
| Cardiogenic shock | 4 | 3885 | 12019 | 53753482 | Cardiac disorders | 4.6 ( 1.73 - 12.28 ) | 4.6 ( 11.27 ) | 4.6 ( 2.02 ) | 2.2 ( 0.53 ) |
| Ventricular fibrillation | 4 | 3885 | 10092 | 53755409 | Cardiac disorders | 5.48 ( 2.06 - 14.62 ) | 5.48 ( 14.65 ) | 5.48 ( 2.41 ) | 2.45 ( 0.79 ) |
| Necrosis | 4 | 3885 | 5049 | 53760452 | General disorders and administration site conditions | 10.96 ( 4.11 - 29.24 ) | 10.95 ( 36.15 ) | 10.94 ( 4.82 ) | 3.45 ( 1.79 ) |
| Wound necrosis | 4 | 3885 | 419 | 53765082 | Injury, poisoning and procedural complications | 132.12 ( 49.33 - 353.84 ) | 131.98 ( 515.04 ) | 130.74 ( 57.33 ) | 7.03 ( 5.36 ) |
| Ecchymosis | 3 | 3886 | 6307 | 53759194 | Skin and subcutaneous tissue disorders | 6.58 ( 2.12 - 20.42 ) | 6.58 ( 14.18 ) | 6.57 ( 2.55 ) | 2.72 ( 1.05 ) |
| Electrocardiogram abnormal | 3 | 3886 | 7282 | 53758219 | Investigations | 5.7 ( 1.84 - 17.68 ) | 5.7 ( 11.61 ) | 5.69 ( 2.21 ) | 2.51 ( 0.84 ) |
| Anaesthetic complication cardiac | 3 | 3886 | 60 | 53765441 | Injury, poisoning and procedural complications | 691.78 ( 216.87 - 2206.7 ) | 691.25 ( 1969.29 ) | 658.38 ( 249.43 ) | 9.36 ( 7.66 ) |
| Anastomotic leak | 3 | 3886 | 614 | 53764887 | Injury, poisoning and procedural complications | 67.6 ( 21.73 - 210.28 ) | 67.55 ( 195.74 ) | 67.23 ( 26.01 ) | 6.07 ( 4.4 ) |
| Pulseless electrical activity | 3 | 3886 | 3494 | 53762007 | Cardiac disorders | 11.88 ( 3.83 - 36.87 ) | 11.87 ( 29.84 ) | 11.86 ( 4.6 ) | 3.57 ( 1.9 ) |
| Peripheral artery occlusion | 3 | 3886 | 1216 | 53764285 | Vascular disorders | 34.13 ( 10.99 - 106.03 ) | 34.11 ( 96.18 ) | 34.03 ( 13.18 ) | 5.09 ( 3.42 ) |
| Sinus arrest | 3 | 3886 | 1355 | 53764146 | Cardiac disorders | 30.63 ( 9.86 - 95.14 ) | 30.61 ( 85.74 ) | 30.54 ( 11.83 ) | 4.93 ( 3.26 ) |
| Femoral nerve palsy | 3 | 3886 | 55 | 53765446 | Nervous system disorders | 754.67 ( 235.99 - 2413.35 ) | 754.09 ( 2139.58 ) | 715.14 ( 270.37 ) | 9.48 ( 7.77 ) |
| Apnoea | 3 | 3886 | 7134 | 53758367 | Respiratory, thoracic and mediastinal disorders | 5.82 ( 1.87 - 18.05 ) | 5.81 ( 11.95 ) | 5.81 ( 2.25 ) | 2.54 ( 0.87 ) |
| Infusion site rash | 3 | 3886 | 1178 | 53764323 | General disorders and administration site conditions | 35.23 ( 11.34 - 109.45 ) | 35.21 ( 99.46 ) | 35.12 ( 13.6 ) | 5.13 ( 3.47 ) |
| Rebound effect | 3 | 3886 | 7515 | 53757986 | General disorders and administration site conditions | 5.52 ( 1.78 - 17.13 ) | 5.52 ( 11.1 ) | 5.52 ( 2.14 ) | 2.46 ( 0.8 ) |
| Paresis | 3 | 3886 | 2075 | 53763426 | Nervous system disorders | 20 ( 6.44 - 62.1 ) | 19.99 ( 54.04 ) | 19.96 ( 7.74 ) | 4.32 ( 2.65 ) |
| Incision site rash | 3 | 3886 | 47 | 53765454 | Injury, poisoning and procedural complications | 883.13 ( 274.76 - 2838.57 ) | 882.45 ( 2482.87 ) | 829.56 ( 312.29 ) | 9.7 ( 7.98 ) |
| Impaired gastric emptying | 3 | 3886 | 7188 | 53758313 | Gastrointestinal disorders | 5.77 ( 1.86 - 17.91 ) | 5.77 ( 11.83 ) | 5.77 ( 2.24 ) | 2.53 ( 0.86 ) |
| Bupivacine | | | | | | | | | | |
| PT | a | b | c | d | SOC_NAME_EN | ROR(95%Cl) | PRR(χ2) | EBGM(EBGM05) | IC(IC025) |
| Hypotension | 92 | 4067 | 178337 | 53586894 | Vascular disorders | 6.8 ( 5.53 - 8.36 ) | 6.67 ( 444.59 ) | 6.67 ( 5.61 ) | 2.74 ( 1.07 ) |
| Cardiac arrest | 42 | 4117 | 74287 | 53690944 | Cardiac disorders | 7.37 ( 5.44 - 9.99 ) | 7.31 ( 228.91 ) | 7.31 ( 5.66 ) | 2.87 ( 1.2 ) |
| Bradycardia | 42 | 4117 | 48395 | 53716836 | Cardiac disorders | 11.32 ( 8.35 - 15.35 ) | 11.22 ( 390.96 ) | 11.21 ( 8.69 ) | 3.49 ( 1.82 ) |
| Chondrolysis | 34 | 4125 | 435 | 53764796 | Musculoskeletal and connective tissue disorders | 1018.74 ( 717.64 - 1446.18 ) | 1010.42 ( 31801.04 ) | 937.24 ( 699.09 ) | 9.87 ( 8.2 ) |
| Horner's syndrome | 31 | 4128 | 421 | 53764810 | Nervous system disorders | 959.04 ( 665.08 - 1382.94 ) | 951.9 ( 27427.63 ) | 886.69 ( 652.77 ) | 9.79 ( 8.12 ) |
| Muscular weakness | 29 | 4130 | 102401 | 53662830 | Musculoskeletal and connective tissue disorders | 3.68 ( 2.55 - 5.3 ) | 3.66 ( 56.18 ) | 3.66 ( 2.7 ) | 1.87 ( 0.21 ) |
| Musculoskeletal pain | 23 | 4136 | 49818 | 53715413 | Musculoskeletal and connective tissue disorders | 6 ( 3.98 - 9.03 ) | 5.97 ( 95.17 ) | 5.97 ( 4.23 ) | 2.58 ( 0.91 ) |
| Tachycardia | 22 | 4137 | 78826 | 53686405 | Cardiac disorders | 3.62 ( 2.38 - 5.51 ) | 3.61 ( 41.52 ) | 3.61 ( 2.54 ) | 1.85 ( 0.18 ) |
| Generalised tonic-clonic seizure | 20 | 4139 | 13688 | 53751543 | Nervous system disorders | 18.98 ( 12.23 - 29.45 ) | 18.89 ( 338.43 ) | 18.86 ( 13.06 ) | 4.24 ( 2.57 ) |
| Sensory loss | 19 | 4140 | 7290 | 53757941 | Nervous system disorders | 33.84 ( 21.55 - 53.14 ) | 33.69 ( 601.24 ) | 33.61 ( 23.04 ) | 5.07 ( 3.4 ) |
| Blood pressure decreased | 18 | 4141 | 59722 | 53705509 | Investigations | 3.91 ( 2.46 - 6.21 ) | 3.9 ( 38.78 ) | 3.9 ( 2.64 ) | 1.96 ( 0.3 ) |
| Cardio-respiratory arrest | 16 | 4143 | 38229 | 53727002 | Cardiac disorders | 5.43 ( 3.32 - 8.87 ) | 5.41 ( 57.54 ) | 5.41 ( 3.59 ) | 2.44 ( 0.77 ) |
| Diplopia | 16 | 4143 | 23067 | 53742164 | Eye disorders | 9 ( 5.51 - 14.7 ) | 8.97 ( 113.22 ) | 8.96 ( 5.94 ) | 3.16 ( 1.5 ) |
| Neurotoxicity | 16 | 4143 | 14326 | 53750905 | Nervous system disorders | 14.49 ( 8.87 - 23.68 ) | 14.44 ( 199.95 ) | 14.42 ( 9.56 ) | 3.85 ( 2.18 ) |
| Myoclonus | 16 | 4143 | 10609 | 53754622 | Nervous system disorders | 19.57 ( 11.97 - 31.98 ) | 19.5 ( 280.4 ) | 19.47 ( 12.91 ) | 4.28 ( 2.62 ) |
| Depressed level of consciousness | 15 | 4144 | 35512 | 53729719 | Nervous system disorders | 5.48 ( 3.3 - 9.09 ) | 5.46 ( 54.67 ) | 5.46 ( 3.57 ) | 2.45 ( 0.78 ) |
| Joint range of motion decreased | 15 | 4144 | 11142 | 53754089 | Musculoskeletal and connective tissue disorders | 17.46 ( 10.51 - 29 ) | 17.4 ( 231.65 ) | 17.38 ( 11.37 ) | 4.12 ( 2.45 ) |
| Meningitis aseptic | 15 | 4144 | 3822 | 53761409 | Infections and infestations | 50.92 ( 30.64 - 84.62 ) | 50.74 ( 728.52 ) | 50.54 ( 33.04 ) | 5.66 ( 3.99 ) |
| Urinary incontinence | 14 | 4145 | 26785 | 53738446 | Renal and urinary disorders | 6.78 ( 4.01 - 11.45 ) | 6.76 ( 68.67 ) | 6.75 ( 4.35 ) | 2.76 ( 1.09 ) |
| Acute macular neuroretinopathy | 14 | 4145 | 100 | 53765131 | Eye disorders | 1815.95 ( 1037.16 - 3179.54 ) | 1809.84 ( 22201.62 ) | 1587.7 ( 993.63 ) | 10.63 ( 8.94 ) |
| Ventricular fibrillation | 13 | 4146 | 10083 | 53755148 | Cardiac disorders | 16.72 ( 9.69 - 28.82 ) | 16.67 ( 191.24 ) | 16.65 ( 10.55 ) | 4.06 ( 2.39 ) |
| Peroneal nerve palsy | 13 | 4146 | 5229 | 53760002 | Nervous system disorders | 32.24 ( 18.69 - 55.6 ) | 32.14 ( 391.28 ) | 32.06 ( 20.32 ) | 5 ( 3.34 ) |
| Strabismus | 13 | 4146 | 2635 | 53762596 | Eye disorders | 63.98 ( 37.07 - 110.42 ) | 63.78 ( 799.42 ) | 63.47 ( 40.2 ) | 5.99 ( 4.32 ) |
| Respiratory arrest | 12 | 4147 | 25902 | 53739329 | Respiratory, thoracic and mediastinal disorders | 6 ( 3.41 - 10.58 ) | 5.99 ( 49.87 ) | 5.99 ( 3.73 ) | 2.58 ( 0.92 ) |
| Ventricular tachycardia | 12 | 4147 | 14794 | 53750437 | Cardiac disorders | 10.51 ( 5.96 - 18.53 ) | 10.49 ( 102.92 ) | 10.48 ( 6.52 ) | 3.39 ( 1.72 ) |
| Cardiotoxicity | 12 | 4147 | 7143 | 53758088 | Cardiac disorders | 21.78 ( 12.35 - 38.4 ) | 21.72 ( 236.8 ) | 21.68 ( 13.49 ) | 4.44 ( 2.77 ) |
| Wound necrosis | 12 | 4147 | 411 | 53764820 | Injury, poisoning and procedural complications | 378.53 ( 213.04 - 672.57 ) | 377.44 ( 4377.58 ) | 366.76 ( 226.73 ) | 8.52 ( 6.85 ) |
| Hypoxia | 11 | 4148 | 30677 | 53734554 | Respiratory, thoracic and mediastinal disorders | 4.65 ( 2.57 - 8.4 ) | 4.64 ( 31.37 ) | 4.63 ( 2.82 ) | 2.21 ( 0.55 ) |
| Urinary retention | 11 | 4148 | 29332 | 53735899 | Renal and urinary disorders | 4.86 ( 2.69 - 8.78 ) | 4.85 ( 33.6 ) | 4.85 ( 2.95 ) | 2.28 ( 0.61 ) |
| Status epilepticus | 11 | 4148 | 9799 | 53755432 | Nervous system disorders | 14.55 ( 8.05 - 26.3 ) | 14.51 ( 138.26 ) | 14.5 ( 8.83 ) | 3.86 ( 2.19 ) |
| Apnoea | 11 | 4148 | 7126 | 53758105 | Respiratory, thoracic and mediastinal disorders | 20.01 ( 11.07 - 36.17 ) | 19.96 ( 197.78 ) | 19.93 ( 12.14 ) | 4.32 ( 2.65 ) |
| Respiratory depression | 10 | 4149 | 11034 | 53754197 | Respiratory, thoracic and mediastinal disorders | 11.74 ( 6.31 - 21.85 ) | 11.72 ( 97.94 ) | 11.71 ( 6.96 ) | 3.55 ( 1.88 ) |
| Anal incontinence | 10 | 4149 | 7352 | 53757879 | Gastrointestinal disorders | 17.62 ( 9.47 - 32.79 ) | 17.58 ( 156.21 ) | 17.56 ( 10.44 ) | 4.13 ( 2.47 ) |
| Respiratory distress | 9 | 4150 | 24578 | 53740653 | Respiratory, thoracic and mediastinal disorders | 4.74 ( 2.47 - 9.12 ) | 4.73 ( 26.51 ) | 4.73 ( 2.74 ) | 2.24 ( 0.58 ) |
| Paraplegia | 9 | 4150 | 2564 | 53762667 | Nervous system disorders | 45.47 ( 23.62 - 87.56 ) | 45.38 ( 389.24 ) | 45.22 ( 26.14 ) | 5.5 ( 3.83 ) |
| Retinal artery occlusion | 9 | 4150 | 2129 | 53763102 | Eye disorders | 54.76 ( 28.44 - 105.47 ) | 54.65 ( 472.03 ) | 54.42 ( 31.45 ) | 5.77 ( 4.1 ) |
| Arachnoiditis | 9 | 4150 | 633 | 53764598 | Nervous system disorders | 184.2 ( 95.33 - 355.91 ) | 183.8 ( 1613.35 ) | 181.24 ( 104.45 ) | 7.5 ( 5.83 ) |
| Drug-induced liver injury | 8 | 4151 | 23669 | 53741562 | Hepatobiliary disorders | 4.38 ( 2.19 - 8.76 ) | 4.37 ( 20.79 ) | 4.37 ( 2.44 ) | 2.13 ( 0.46 ) |
| Anaphylactic shock | 8 | 4151 | 21736 | 53743495 | Immune system disorders | 4.77 ( 2.38 - 9.54 ) | 4.76 ( 23.75 ) | 4.76 ( 2.66 ) | 2.25 ( 0.58 ) |
| Paralysis | 8 | 4151 | 13001 | 53752230 | Nervous system disorders | 7.97 ( 3.98 - 15.95 ) | 7.95 ( 48.63 ) | 7.95 ( 4.45 ) | 2.99 ( 1.32 ) |
| Myocardial ischaemia | 7 | 4152 | 10931 | 53754300 | Cardiac disorders | 8.29 ( 3.95 - 17.41 ) | 8.28 ( 44.78 ) | 8.27 ( 4.45 ) | 3.05 ( 1.38 ) |
| Ventricular extrasystoles | 7 | 4152 | 9540 | 53755691 | Cardiac disorders | 9.5 ( 4.52 - 19.95 ) | 9.49 ( 53.11 ) | 9.48 ( 5.1 ) | 3.24 ( 1.58 ) |
| Bradycardia foetal | 7 | 4152 | 719 | 53764512 | Cardiac disorders | 126.07 ( 59.85 - 265.56 ) | 125.86 ( 858.71 ) | 124.65 ( 66.83 ) | 6.96 ( 5.29 ) |
| Foetal heart rate deceleration abnormality | 7 | 4152 | 579 | 53764652 | Cardiac disorders | 156.55 ( 74.25 - 330.06 ) | 156.29 ( 1067.19 ) | 154.44 ( 82.74 ) | 7.27 ( 5.6 ) |
| Sinus tachycardia | 6 | 4153 | 12729 | 53752502 | Cardiac disorders | 6.1 ( 2.74 - 13.59 ) | 6.09 ( 25.54 ) | 6.09 ( 3.12 ) | 2.61 ( 0.94 ) |
| Aphonia | 6 | 4153 | 12397 | 53752834 | Respiratory, thoracic and mediastinal disorders | 6.26 ( 2.81 - 13.95 ) | 6.26 ( 26.49 ) | 6.25 ( 3.2 ) | 2.64 ( 0.98 ) |
| Eyelid ptosis | 6 | 4153 | 8702 | 53756529 | Eye disorders | 8.92 ( 4.01 - 19.88 ) | 8.91 ( 42.13 ) | 8.91 ( 4.56 ) | 3.16 ( 1.49 ) |
| Stress cardiomyopathy | 6 | 4153 | 4721 | 53760510 | Cardiac disorders | 16.45 ( 7.38 - 36.66 ) | 16.43 ( 86.84 ) | 16.41 ( 8.39 ) | 4.04 ( 2.37 ) |
| Monoplegia | 6 | 4153 | 3973 | 53761258 | Nervous system disorders | 19.55 ( 8.77 - 43.57 ) | 19.52 ( 105.29 ) | 19.5 ( 9.97 ) | 4.29 ( 2.62 ) |
| Pulseless electrical activity | 6 | 4153 | 3491 | 53761740 | Cardiac disorders | 22.25 ( 9.98 - 49.59 ) | 22.22 ( 121.38 ) | 22.18 ( 11.34 ) | 4.47 ( 2.8 ) |
| Kounis syndrome | 6 | 4153 | 1888 | 53763343 | Cardiac disorders | 41.14 ( 18.45 - 91.75 ) | 41.08 ( 233.91 ) | 40.96 ( 20.94 ) | 5.36 ( 3.69 ) |
| Sinus arrest | 6 | 4153 | 1352 | 53763879 | Cardiac disorders | 57.45 ( 25.75 - 128.18 ) | 57.37 ( 330.87 ) | 57.12 ( 29.19 ) | 5.84 ( 4.17 ) |
| Spinal cord infarction | 6 | 4153 | 369 | 53764862 | Nervous system disorders | 210.5 ( 93.91 - 471.88 ) | 210.2 ( 1229.26 ) | 206.86 ( 105.28 ) | 7.69 ( 6.02 ) |
| Sensory disturbance | 5 | 4154 | 15054 | 53750177 | Nervous system disorders | 4.3 ( 1.79 - 10.33 ) | 4.29 ( 12.63 ) | 4.29 ( 2.06 ) | 2.1 ( 0.44 ) |
| Cyanosis | 5 | 4154 | 14204 | 53751027 | Vascular disorders | 4.55 ( 1.89 - 10.95 ) | 4.55 ( 13.85 ) | 4.55 ( 2.18 ) | 2.19 ( 0.52 ) |
| Nerve injury | 5 | 4154 | 10245 | 53754986 | Injury, poisoning and procedural complications | 6.32 ( 2.63 - 15.18 ) | 6.31 ( 22.33 ) | 6.31 ( 3.03 ) | 2.66 ( 0.99 ) |
| Dizziness postural | 5 | 4154 | 8064 | 53757167 | Nervous system disorders | 8.02 ( 3.34 - 19.29 ) | 8.02 ( 30.69 ) | 8.01 ( 3.84 ) | 3 ( 1.34 ) |
| Hyperaesthesia | 5 | 4154 | 7805 | 53757426 | Nervous system disorders | 8.29 ( 3.45 - 19.93 ) | 8.28 ( 32 ) | 8.28 ( 3.97 ) | 3.05 ( 1.38 ) |
| Hiccups | 5 | 4154 | 7041 | 53758190 | Respiratory, thoracic and mediastinal disorders | 9.19 ( 3.82 - 22.1 ) | 9.18 ( 36.42 ) | 9.17 ( 4.4 ) | 3.2 ( 1.53 ) |
| Haemodynamic instability | 5 | 4154 | 6256 | 53758975 | Vascular disorders | 10.34 ( 4.3 - 24.87 ) | 10.33 ( 42.12 ) | 10.32 ( 4.95 ) | 3.37 ( 1.7 ) |
| Postoperative wound infection | 5 | 4154 | 6067 | 53759164 | Infections and infestations | 10.67 ( 4.44 - 25.65 ) | 10.65 ( 43.71 ) | 10.65 ( 5.11 ) | 3.41 ( 1.75 ) |
| Neurological symptom | 5 | 4154 | 5016 | 53760215 | Nervous system disorders | 12.9 ( 5.36 - 31.02 ) | 12.89 ( 54.77 ) | 12.87 ( 6.18 ) | 3.69 ( 2.02 ) |
| Dysaesthesia | 5 | 4154 | 2675 | 53762556 | Nervous system disorders | 24.19 ( 10.06 - 58.2 ) | 24.16 ( 110.82 ) | 24.12 ( 11.57 ) | 4.59 ( 2.92 ) |
| Areflexia | 5 | 4154 | 2409 | 53762822 | Nervous system disorders | 26.86 ( 11.16 - 64.63 ) | 26.83 ( 124.09 ) | 26.78 ( 12.84 ) | 4.74 ( 3.08 ) |
| Vith nerve paralysis | 5 | 4154 | 1019 | 53764212 | Nervous system disorders | 63.51 ( 26.36 - 152.99 ) | 63.43 ( 305.74 ) | 63.13 ( 30.25 ) | 5.98 ( 4.31 ) |
| Brugada syndrome | 5 | 4154 | 873 | 53764358 | Congenital, familial and genetic disorders | 74.13 ( 30.76 - 178.64 ) | 74.04 ( 358.22 ) | 73.62 ( 35.27 ) | 6.2 ( 4.53 ) |
| Diaphragmatic paralysis | 5 | 4154 | 516 | 53764715 | Respiratory, thoracic and mediastinal disorders | 125.42 ( 51.95 - 302.76 ) | 125.27 ( 610.46 ) | 124.07 ( 59.35 ) | 6.96 ( 5.28 ) |
| Neuromuscular block prolonged | 5 | 4154 | 333 | 53764898 | Injury, poisoning and procedural complications | 194.34 ( 80.32 - 470.23 ) | 194.11 ( 946.35 ) | 191.25 ( 91.31 ) | 7.58 ( 5.91 ) |
| Mydriasis | 4 | 4155 | 11190 | 53754041 | Eye disorders | 4.62 ( 1.73 - 12.33 ) | 4.62 ( 11.35 ) | 4.62 ( 2.03 ) | 2.21 ( 0.54 ) |
| Muscle rigidity | 4 | 4155 | 10781 | 53754450 | Musculoskeletal and connective tissue disorders | 4.8 ( 1.8 - 12.8 ) | 4.8 ( 12.02 ) | 4.79 ( 2.11 ) | 2.26 ( 0.59 ) |
| Sinus bradycardia | 4 | 4155 | 8658 | 53756573 | Cardiac disorders | 5.98 ( 2.24 - 15.94 ) | 5.97 ( 16.55 ) | 5.97 ( 2.63 ) | 2.58 ( 0.91 ) |
| Haemolytic anaemia | 4 | 4155 | 8001 | 53757230 | Blood and lymphatic system disorders | 6.47 ( 2.43 - 17.25 ) | 6.46 ( 18.46 ) | 6.46 ( 2.84 ) | 2.69 ( 1.02 ) |
| Hypovolaemia | 4 | 4155 | 5215 | 53760016 | Metabolism and nutrition disorders | 9.92 ( 3.72 - 26.46 ) | 9.92 ( 32.04 ) | 9.91 ( 4.36 ) | 3.31 ( 1.64 ) |
| Potentiating drug interaction | 4 | 4155 | 2836 | 53762395 | General disorders and administration site conditions | 18.25 ( 6.84 - 48.68 ) | 18.23 ( 65.06 ) | 18.21 ( 8.01 ) | 4.19 ( 2.52 ) |
| Radiculopathy | 4 | 4155 | 2470 | 53762761 | Nervous system disorders | 20.95 ( 7.85 - 55.9 ) | 20.94 ( 75.81 ) | 20.9 ( 9.2 ) | 4.39 ( 2.72 ) |
| Myelopathy | 4 | 4155 | 1699 | 53763532 | Nervous system disorders | 30.46 ( 11.41 - 81.3 ) | 30.44 ( 113.61 ) | 30.37 ( 13.36 ) | 4.92 ( 3.26 ) |
| Vocal cord paralysis | 4 | 4155 | 1598 | 53763633 | Nervous system disorders | 32.39 ( 12.14 - 86.45 ) | 32.36 ( 121.26 ) | 32.28 ( 14.2 ) | 5.01 ( 3.34 ) |
| Paraparesis | 4 | 4155 | 1600 | 53763631 | Nervous system disorders | 32.35 ( 12.12 - 86.34 ) | 32.32 ( 121.1 ) | 32.24 ( 14.18 ) | 5.01 ( 3.34 ) |
| Soft tissue necrosis | 4 | 4155 | 589 | 53764642 | Musculoskeletal and connective tissue disorders | 87.88 ( 32.86 - 235.03 ) | 87.79 ( 340.9 ) | 87.21 ( 38.29 ) | 6.45 ( 4.78 ) |
| Phrenic nerve paralysis | 4 | 4155 | 171 | 53765060 | Nervous system disorders | 302.69 ( 112.26 - 816.12 ) | 302.4 ( 1174.14 ) | 295.51 ( 128.87 ) | 8.21 ( 6.53 ) |
| Spinal cord ischaemia | 4 | 4155 | 139 | 53765092 | Nervous system disorders | 372.37 ( 137.75 - 1006.62 ) | 372.01 ( 1438.67 ) | 361.63 ( 157.36 ) | 8.5 ( 6.81 ) |
| Baseline foetal heart rate variability disorder | 4 | 4155 | 38 | 53765193 | Cardiac disorders | 1362.09 ( 485.92 - 3818.12 ) | 1360.78 ( 4917.51 ) | 1231.28 ( 519.75 ) | 10.27 ( 8.54 ) |
| Bezold-jarisch reflex | 4 | 4155 | 27 | 53765204 | Cardiac disorders | 1917.02 ( 670.48 - 5481.06 ) | 1915.18 ( 6665.27 ) | 1668.19 ( 692.62 ) | 10.7 ( 8.96 ) |
| Hyperthermia | 3 | 4156 | 6774 | 53758457 | General disorders and administration site conditions | 5.73 ( 1.85 - 17.77 ) | 5.73 ( 11.7 ) | 5.72 ( 2.22 ) | 2.52 ( 0.85 ) |
| Formication | 3 | 4156 | 6441 | 53758790 | Nervous system disorders | 6.02 ( 1.94 - 18.69 ) | 6.02 ( 12.56 ) | 6.02 ( 2.33 ) | 2.59 ( 0.92 ) |
| Left ventricular dysfunction | 3 | 4156 | 5800 | 53759431 | Cardiac disorders | 6.69 ( 2.16 - 20.76 ) | 6.69 ( 14.5 ) | 6.68 ( 2.59 ) | 2.74 ( 1.07 ) |
| Pulse absent | 3 | 4156 | 4362 | 53760869 | Investigations | 8.9 ( 2.87 - 27.61 ) | 8.89 ( 21 ) | 8.89 ( 3.44 ) | 3.15 ( 1.48 ) |
| Ischaemia | 3 | 4156 | 4288 | 53760943 | Vascular disorders | 9.05 ( 2.92 - 28.08 ) | 9.04 ( 21.45 ) | 9.04 ( 3.5 ) | 3.18 ( 1.51 ) |
| Anaphylactoid reaction | 3 | 4156 | 3664 | 53761567 | Immune system disorders | 10.59 ( 3.41 - 32.87 ) | 10.58 ( 26.02 ) | 10.58 ( 4.1 ) | 3.4 ( 1.74 ) |
| Arteriospasm coronary | 3 | 4156 | 3390 | 53761841 | Cardiac disorders | 11.45 ( 3.69 - 35.53 ) | 11.44 ( 28.56 ) | 11.43 ( 4.43 ) | 3.51 ( 1.85 ) |
| Jaundice cholestatic | 3 | 4156 | 3198 | 53762033 | Hepatobiliary disorders | 12.14 ( 3.91 - 37.66 ) | 12.13 ( 30.6 ) | 12.12 ( 4.7 ) | 3.6 ( 1.93 ) |
| Deafness neurosensory | 3 | 4156 | 2743 | 53762488 | Ear and labyrinth disorders | 14.15 ( 4.56 - 43.91 ) | 14.14 ( 36.59 ) | 14.12 ( 5.47 ) | 3.82 ( 2.15 ) |
| Autonomic nervous system imbalance | 3 | 4156 | 2414 | 53762817 | Nervous system disorders | 16.08 ( 5.18 - 49.9 ) | 16.07 ( 42.33 ) | 16.05 ( 6.22 ) | 4 ( 2.34 ) |
| Ventricular dysfunction | 3 | 4156 | 2213 | 53763018 | Cardiac disorders | 17.54 ( 5.65 - 54.44 ) | 17.52 ( 46.68 ) | 17.5 ( 6.78 ) | 4.13 ( 2.46 ) |
| Injection site abscess | 3 | 4156 | 2168 | 53763063 | Infections and infestations | 17.9 ( 5.77 - 55.57 ) | 17.89 ( 47.77 ) | 17.87 ( 6.92 ) | 4.16 ( 2.49 ) |
| Neurogenic bladder | 3 | 4156 | 1950 | 53763281 | Renal and urinary disorders | 19.9 ( 6.41 - 61.79 ) | 19.89 ( 53.74 ) | 19.86 ( 7.7 ) | 4.31 ( 2.64 ) |
| Diplegia | 3 | 4156 | 1826 | 53763405 | Nervous system disorders | 21.25 ( 6.85 - 65.99 ) | 21.24 ( 57.77 ) | 21.21 ( 8.22 ) | 4.41 ( 2.74 ) |
| Sinus node dysfunction | 3 | 4156 | 1537 | 53763694 | Cardiac disorders | 25.25 ( 8.13 - 78.41 ) | 25.23 ( 69.68 ) | 25.19 ( 9.76 ) | 4.65 ( 2.99 ) |
| Complex regional pain syndrome | 3 | 4156 | 1405 | 53763826 | Nervous system disorders | 27.62 ( 8.89 - 85.79 ) | 27.6 ( 76.76 ) | 27.55 ( 10.67 ) | 4.78 ( 3.12 ) |
| Myelitis | 3 | 4156 | 1313 | 53763918 | Infections and infestations | 29.56 ( 9.52 - 91.8 ) | 29.54 ( 82.53 ) | 29.47 ( 11.42 ) | 4.88 ( 3.21 ) |
| Muscle necrosis | 3 | 4156 | 805 | 53764426 | Musculoskeletal and connective tissue disorders | 48.21 ( 15.51 - 149.86 ) | 48.18 ( 138.08 ) | 48 ( 18.58 ) | 5.59 ( 3.92 ) |
| Amaurosis | 3 | 4156 | 664 | 53764567 | Eye disorders | 58.45 ( 18.79 - 181.76 ) | 58.41 ( 168.51 ) | 58.15 ( 22.5 ) | 5.86 ( 4.19 ) |
| Intracranial hypotension | 3 | 4156 | 577 | 53764654 | Nervous system disorders | 67.26 ( 21.62 - 209.25 ) | 67.21 ( 194.68 ) | 66.87 ( 25.87 ) | 6.06 ( 4.39 ) |
| Blindness cortical | 3 | 4156 | 428 | 53764803 | Eye disorders | 90.68 ( 29.12 - 282.39 ) | 90.61 ( 264.02 ) | 89.99 ( 34.78 ) | 6.49 ( 4.82 ) |
| Wound abscess | 3 | 4156 | 323 | 53764908 | Infections and infestations | 120.16 ( 38.53 - 374.67 ) | 120.07 ( 350.97 ) | 118.97 ( 45.94 ) | 6.89 ( 5.22 ) |
| Sciatic nerve palsy | 3 | 4156 | 80 | 53765151 | Nervous system disorders | 485.13 ( 153.14 - 1536.78 ) | 484.78 ( 1396 ) | 467.29 ( 178.07 ) | 8.87 ( 7.17 ) |
| Foetal acidosis | 3 | 4156 | 49 | 53765182 | Pregnancy, puerperium and perinatal conditions | 792.05 ( 246.78 - 2542.11 ) | 791.48 ( 2231.79 ) | 745.87 ( 281.13 ) | 9.54 ( 7.83 ) |

**Table S5: Venn Diagram details.**

| Liposome Bupivacaine Label | Bupivacaine label | Liposome Bupivacaine | Bupivacaine | Count | Values |
| --- | --- | --- | --- | --- | --- |
| TRUE | TRUE | TRUE | TRUE | 4 | Bradycardia, Urinary retention, Ventricular tachycardia, Apnoea |
| FALSE | TRUE | TRUE | TRUE | 2 | Paralysis, Ventricular fibrillation |
| TRUE | FALSE | TRUE | TRUE | 1 | Hypoxia |
| FALSE | FALSE | TRUE | TRUE | 11 | Peroneal nerve palsy, Sensory loss, Horner's syndrome, Nerve injury, Pulse absent, Generalised tonic-clonic seizure, Diaphragmatic paralysis, Anal incontinence, Wound necrosis, Pulseless electrical activity, Sinus arrest |
| TRUE | TRUE | FALSE | TRUE | 2 | Hypotension, Chondrolysis |
| FALSE | TRUE | FALSE | TRUE | 3 | Respiratory arrest, Cardiac arrest, Hypovolaemia |
| TRUE | FALSE | FALSE | TRUE | 7 | Tachycardia, Muscular weakness, Sinus bradycardia, Ventricular extrasystoles, Respiratory depression, Blood pressure decreased, Urinary incontinence |
| FALSE | FALSE | FALSE | TRUE | 77 | Musculoskeletal pain, Cardio-respiratory arrest, Diplopia, Neurotoxicity, Myoclonus, Depressed level of consciousness, Joint range of motion decreased, Meningitis aseptic, Acute macular neuroretinopathy, Strabismus, Cardiotoxicity, Status epilepticus, Respiratory distress, Paraplegia, Retinal artery occlusion, Arachnoiditis, Drug-induced liver injury, Anaphylactic shock, Myocardial ischaemia, Bradycardia foetal, Foetal heart rate deceleration abnormality, Sinus tachycardia, Aphonia, Eyelid ptosis, Stress cardiomyopathy, Monoplegia, Kounis syndrome, Spinal cord infarction, Sensory disturbance, Cyanosis, Dizziness postural, Hyperaesthesia, Hiccups, Haemodynamic instability, Postoperative wound infection, Neurological symptom, Dysaesthesia, Areflexia, Vith nerve paralysis, Brugada syndrome, Neuromuscular block prolonged, Mydriasis, Muscle rigidity, Haemolytic anaemia, Potentiating drug interaction, Radiculopathy, Myelopathy, Vocal cord paralysis, Paraparesis, Soft tissue necrosis, Phrenic nerve paralysis, Spinal cord ischaemia, Baseline foetal heart rate variability disorder, Bezold-jarisch reflex, Hyperthermia, Formication, Left ventricular dysfunction, Ischaemia, Anaphylactoid reaction, Arteriospasm coronary, Jaundice cholestatic, Deafness neurosensory, Autonomic nervous system imbalance, Ventricular dysfunction, Injection site abscess, Neurogenic bladder, Diplegia, Sinus node dysfunction, Complex regional pain syndrome, Myelitis, Muscle necrosis, Amaurosis, Intracranial hypotension, Blindness cortical, Wound abscess, Sciatic nerve palsy, Foetal acidosis |
| TRUE | TRUE | TRUE | FALSE | 0 |  |
| FALSE | TRUE | TRUE | FALSE | 0 |  |
| TRUE | FALSE | TRUE | FALSE | 2 | Paresis, Hypoaesthesia |
| FALSE | FALSE | TRUE | FALSE | 38 | Infection, Seizure, Local anaesthetic systemic toxicity, Ileus, Ileus paralytic, Deep vein thrombosis, Osteoarthritis, Arrhythmia, Ventricular arrhythmia, Wound dehiscence, Delirium, Heart rate decreased, Arthrofibrosis, Impaired healing, Haematoma, Wound infection, Motor dysfunction, Skin necrosis, Delayed recovery from anaesthesia, Atrioventricular block, Breakthrough pain, Arrhythmia supraventricular, Administration site irritation, Administration site swelling, Peripheral ischaemia, Atrioventricular block complete, Cardiogenic shock, Necrosis, Ecchymosis, Electrocardiogram abnormal, Anaesthetic complication cardiac, Anastomotic leak, Peripheral artery occlusion, Femoral nerve palsy, Infusion site rash, Rebound effect, Incision site rash, Impaired gastric emptying |
| TRUE | TRUE | FALSE | FALSE | 14 | Dizziness, Headache, Back pain, Somnolence, Chills, Anxiety, Oedema, Tremor, Hypertension, Restlessness, Vision blurred, Tinnitus, Nausea, Vomiting |
| FALSE | TRUE | FALSE | FALSE | 30 | Tension, Convulsions local, Unconsciousness, Miosis, Hypoventilation, Quadriplegia, Loss of consciousness, Incontinence, Paraesthesia, Meningococcal sepsis, Meningism, Forceps delivery, Cranial nerve palsies multiple, Myocardial depression, Methaemoglobinaemia, Lower gastrointestinal haemorrhage, Upper gastrointestinal haemorrhage, Cardiac failure, Nephropathy toxic, Hyperkalaemia, Renal impairment, Dehydration, Hepatic function abnormal, Drug reaction with eosinophilia and systemic symptoms, Rash, Lymphadenopathy, Face oedema, Hepatitis, Nephritis, Myocarditis |
| TRUE | FALSE | FALSE | FALSE | 35 | Pyrexia, Oedema peripheral, Anaemia, Pruritus, Insomnia, Anaemia postoperative, Muscle spasticity, Haemorrhagic anaemia, Erythema, Pain, Vertigo positional, Syncope, Neck pain, Pruritus generalised, Rash pruritic, Hyperhidrosis, Cold sweat, Urticaria, Palpitations, Supraventricular extrasystoles, Pallor, Confusional state, Depression, Agitation, Laryngospasm, Respiratory failure, Body temperature increased, Blood pressure increased, Oxygen saturation decreased, Drug hypersensitivity, Hypersensitivity, Lethargy, Angioedema, Laryngeal oedema, Sneezing |

**Figure S1: Classification of the AEs related to liposomal bupivacaine.**

**
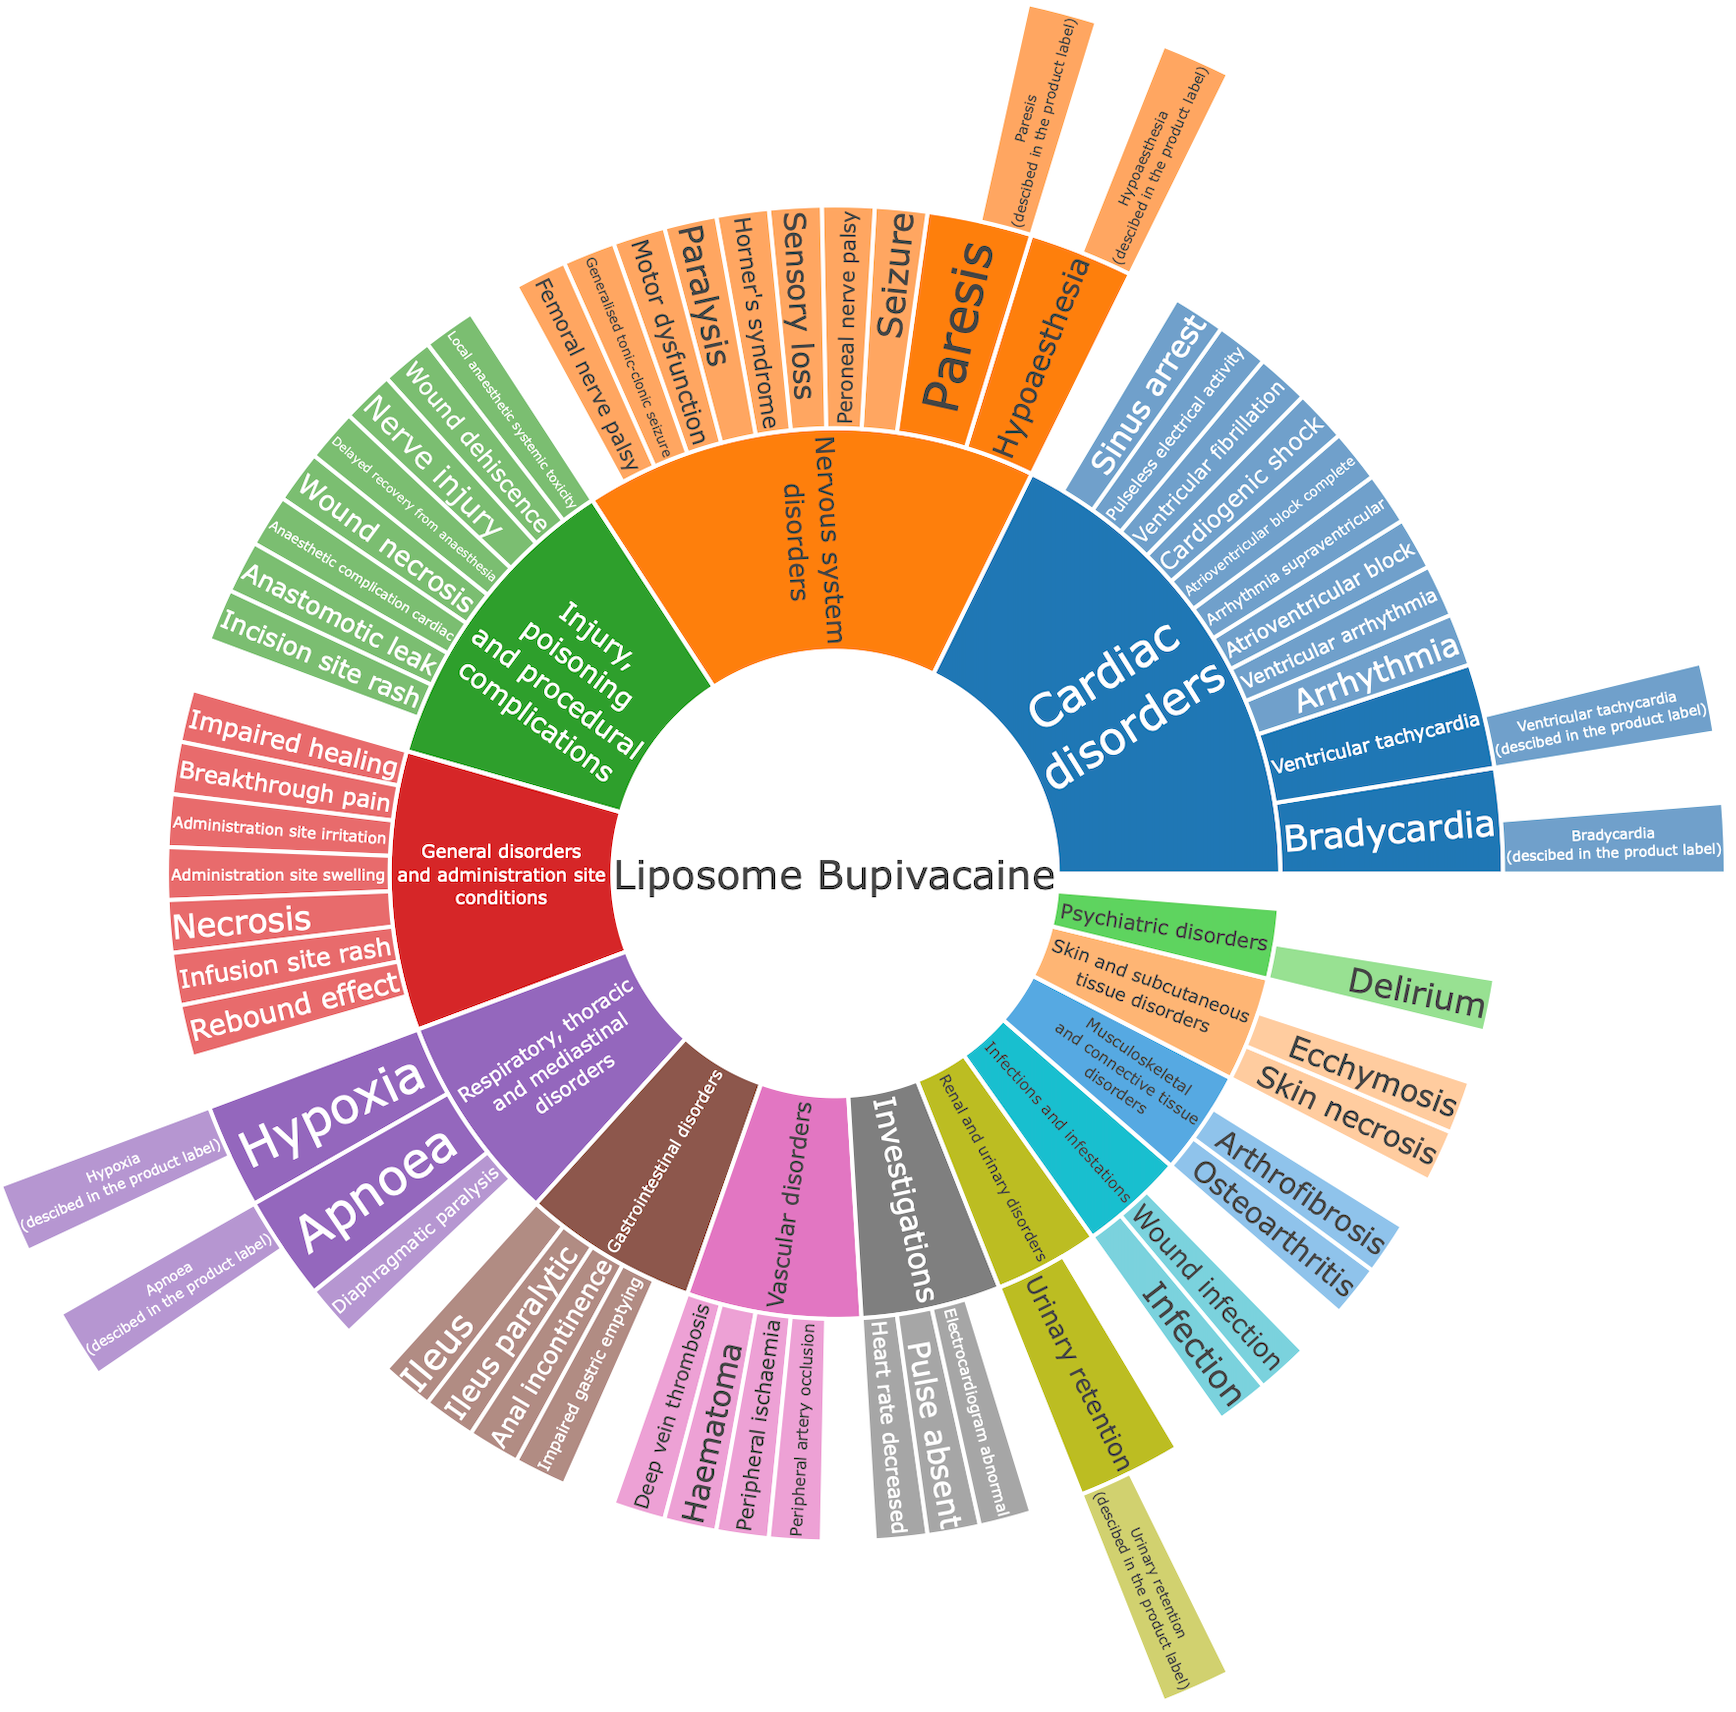
**

**Figure S2: Classification of the AEs related to bupivacaine.**

**
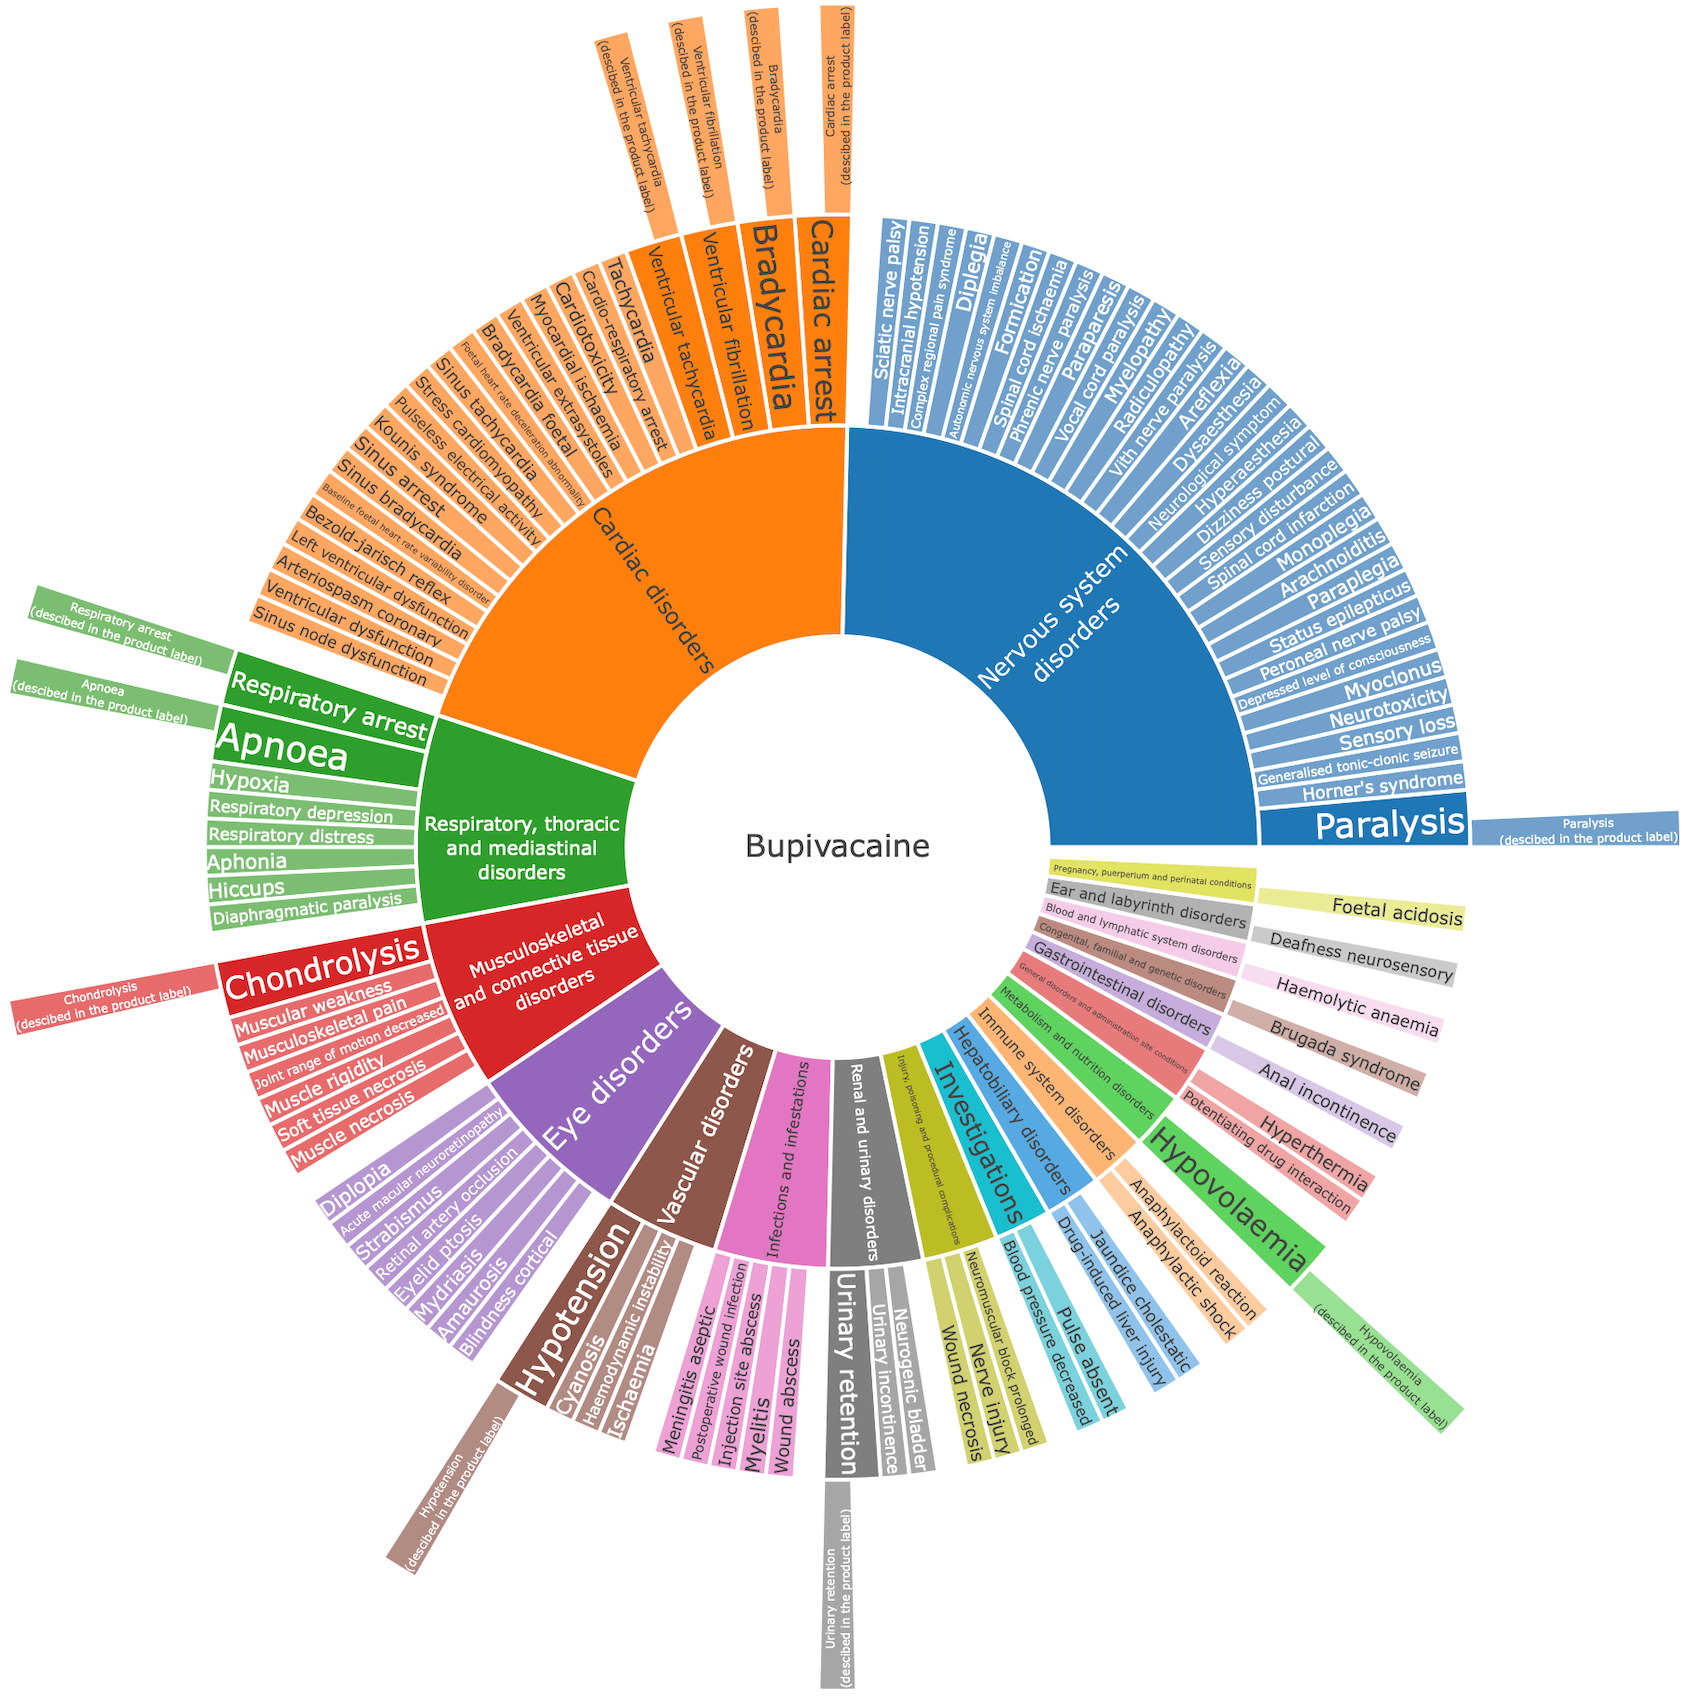
**

**Figure S3: Heatmap depicting 147 AEs associated with liposomal bupivacaine and bupivacaine in the FAERS database across diverse categories (AE, adverse event; Important Medical Event, IME).**

**
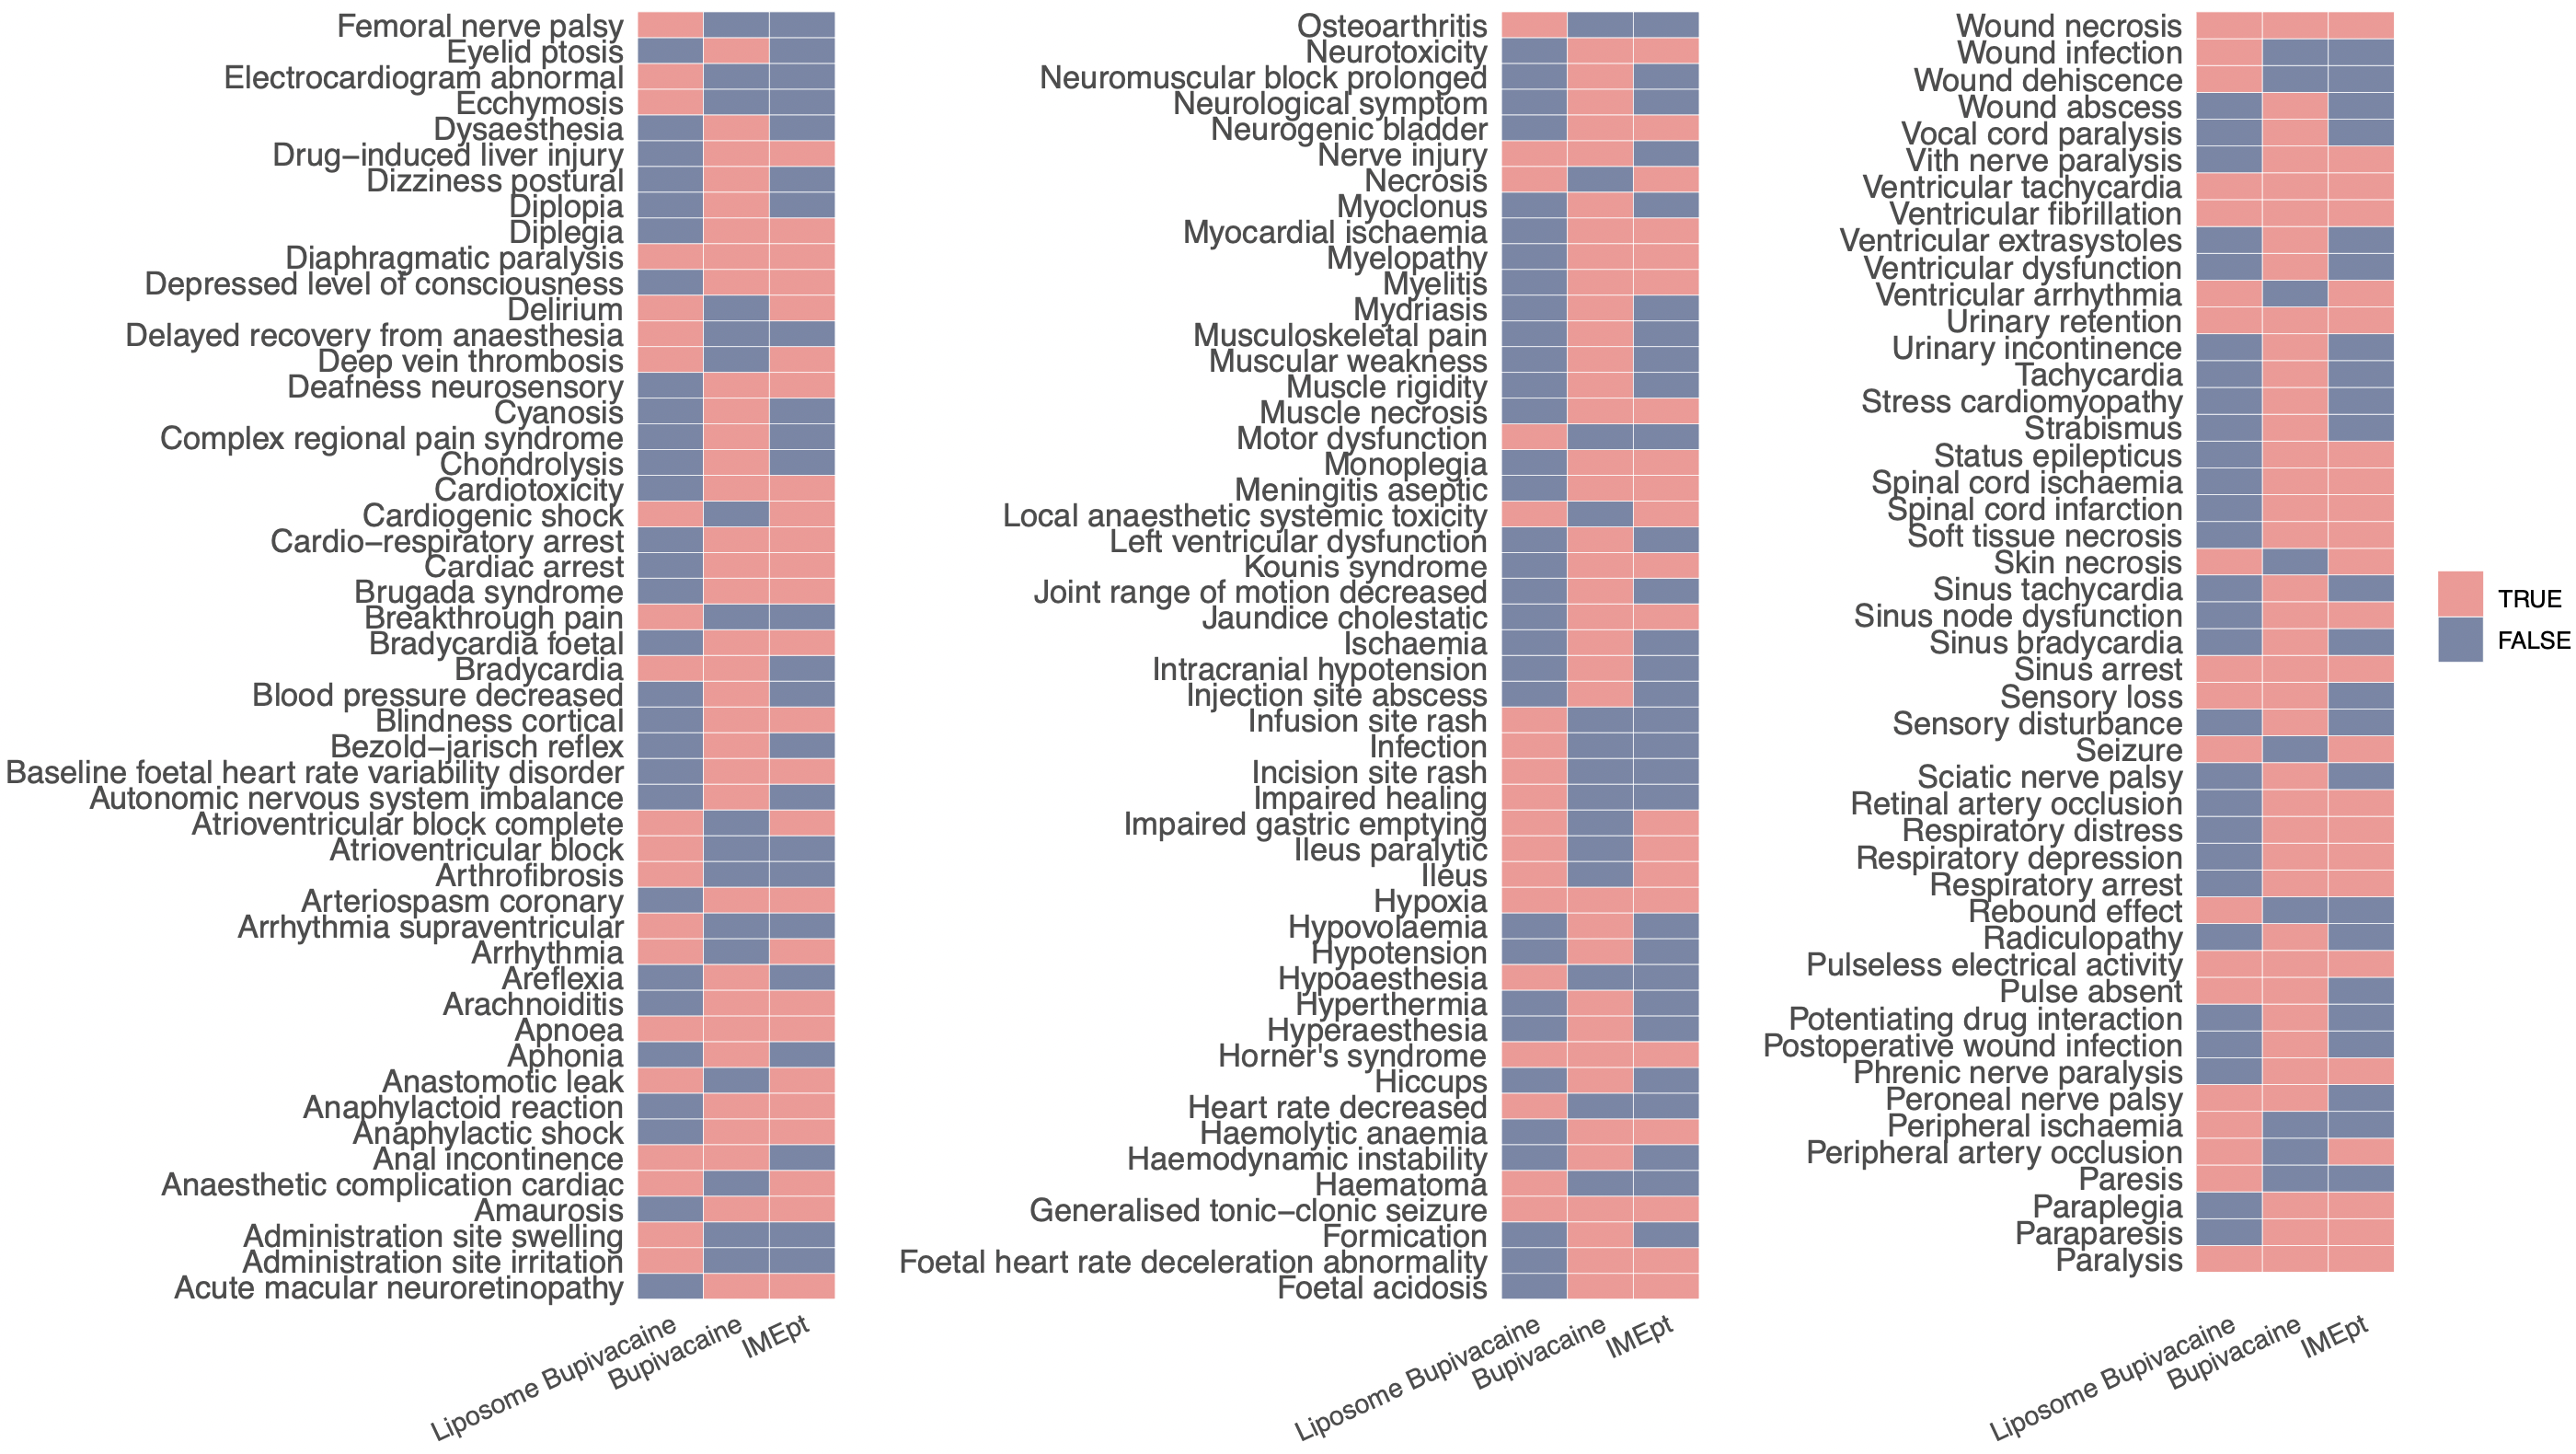
**
